# Supplementary material for: Report from the HarmoSter study: different LC-MS/MS androstenedione, DHEAS and testosterone methods compare well; however, unifying calibration is a double-edged sword
Source: publisher site journal article supplement (doi:10.1515/cclm-2023-1138), 2024-01-11
Supplement: Supplementary file 1 [file j_cclm-2023-1138_suppl_004.docx]

**Supplemental Figure 2. Bland and Altman plot of androstenedione measures according to the calibration system.**

Bold line: median agreement line; dashed line: 95% interval of agreement.

**External calibration**

***In-house calibration***

**Supplemental Figure 3. Bland and Altman plot of DHEAS measures according to the calibration system.**

Bold line: median agreement line; dashed line: 95% interval of agreement.

**External calibration**

***In-house calibration***


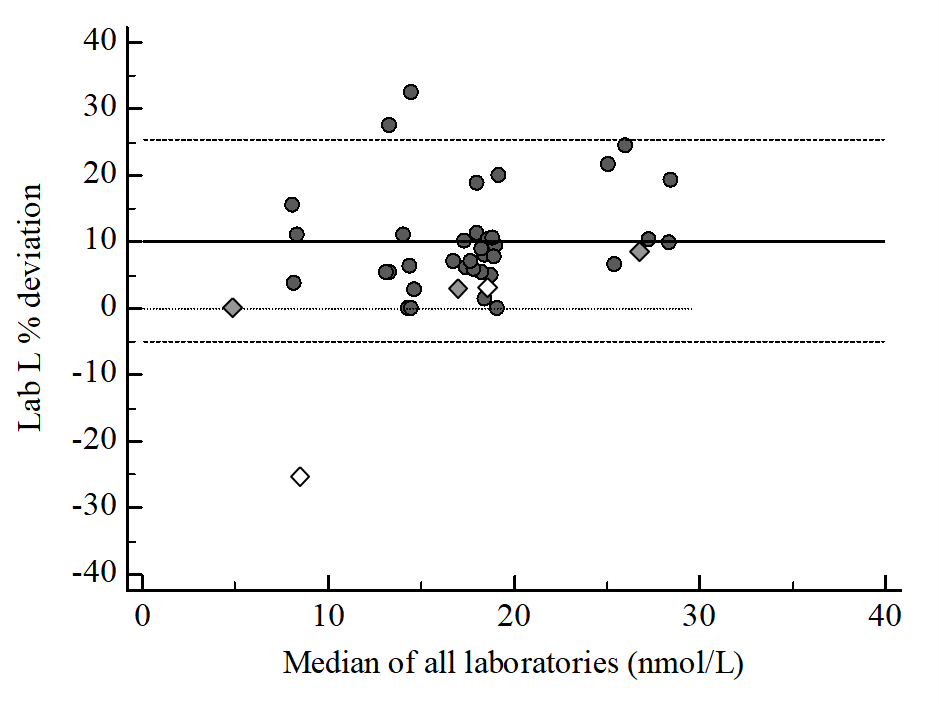

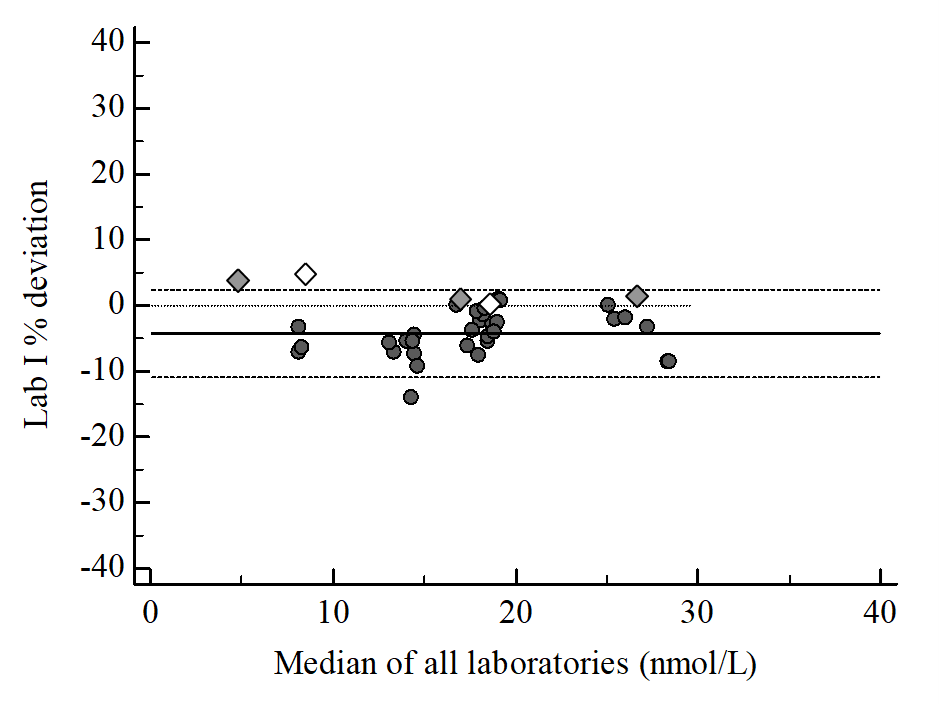

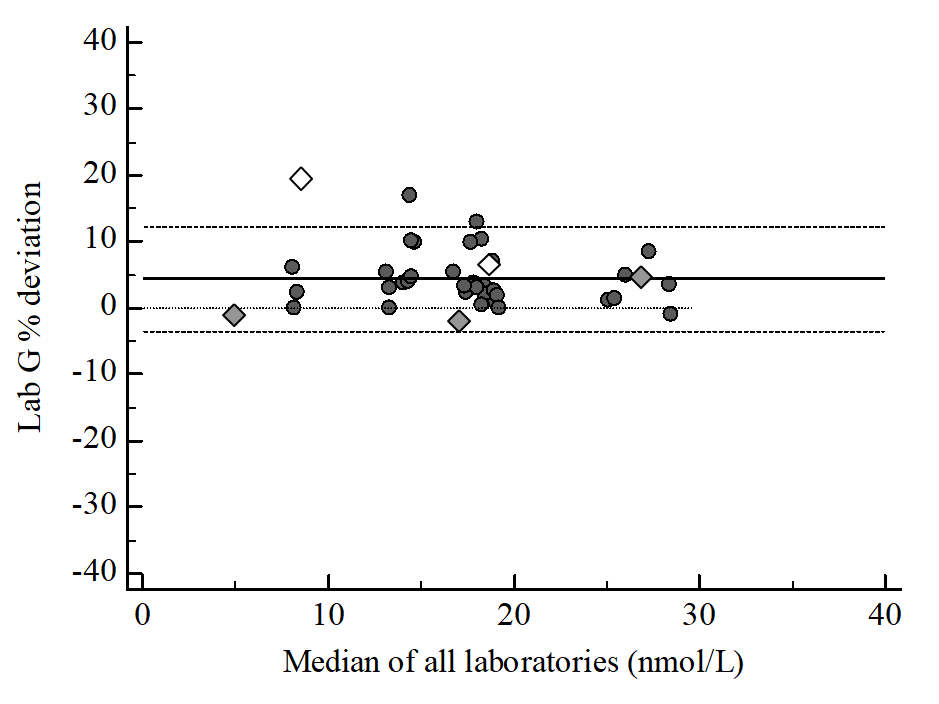

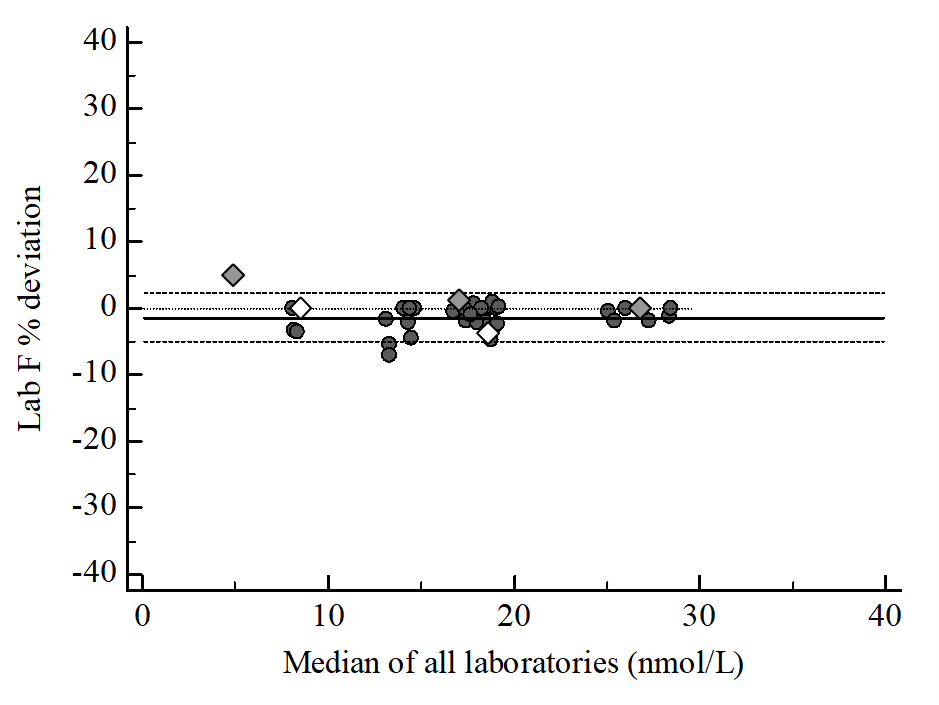

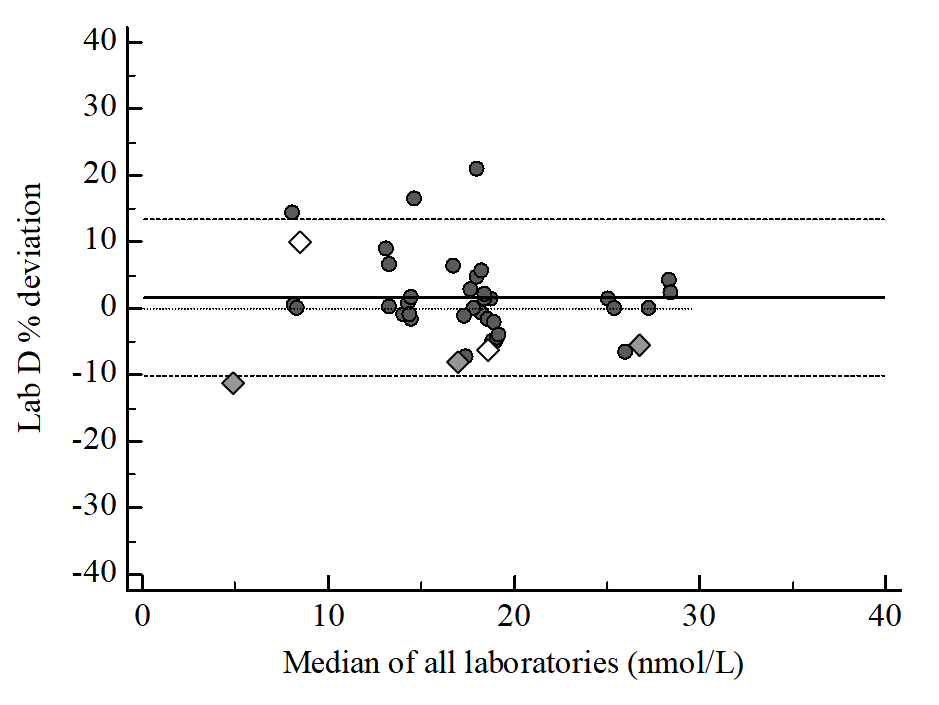


Bold line: median agreement line; dashed line: interval of agreement; dotted line: zero bias line; gray diamond: RfB HM materials; white diamond: Instand N°302 materials.

**Supplemental Figure 4. Commutability of EQA materials tested for testosterone measurement.**

**Supplemental Figure 5. Bland and Altman plot of testosterone measures in the female range according to the calibration system.**

Bold line: median agreement line; dashed line: 95% interval of agreement.

**Supplemental Figure 6. Bland and Altman plot of testosterone measures in the male range according to the calibration system.**

Bold line: median agreement line; dashed line: 95% interval of agreement.
